# Supplementary material for: Groundwater storage dynamics and climate variability in the Lower Kutai Basin of Indonesia: reconciling GRACE ΔGWS to piezometry
Source: Copernicus journal article supplement (doi:10.5194/egusphere-2025-2941), 2025-07-03
Supplement: Supplementary file [file egusphere-2025-2941-AC1-supplement.pdf]

## Responses to reviewer's comments

We appreciate the constructive comments of Jürgen Kusche. In the revised manuscript, we have incorporated changes (highlighted in blue) to address all comments presented below in *italics*. Our responses to each comment are provided in **bold**. Please note that line numbers are provisional and may change in the final revised manuscript after receiving comments from all reviewers.

### #General

*Arifin et al look at three different ways of measuring groundwater storage dynamics in the Lower Kutai Basin (LKB) of Indonesia: the GRACE budget residual approach, data from the existing (few) local piezometric sensors, and the possibility to use the sensors from pumping wells. The study is motivated by the fact that Indonesia's new capital Nusantara is under development in the LKB which will lead to increased pressure on water resources.*

*The main message of the paper seems to me that currently neither of the three approaches can provide a reliable assessment of groundwater resource variability, and the government should think about rolling out a comprehensive measuring network. In my understanding the region is simply too small to be resolved well in GRACE (as the authors know very well), and there are too few in-situ sensors. The authors suggest that about 30% of their GRACE-derived dGWS ensemble timeseries are not usable since they provide unphysical results, and they discuss many timeseries with correlations about 0.3 as „weakly correlated“ – I think given that timeseries here are not very long on climate timescales we can say that such low correlation means nearly uncorrelated.*

*On balance, my judgement is that the topic is very relevant and there seems a pressing need to improve the monitoring system, however the quantitative evidence that is presented is a bit weak and the logic is not straightforward. It is clear that the region is not well suited for a thorough assessment of the GRACE data, or the GRACE residual approach for groundwater, since the basin is too small, the GRACE data are affected by ocean signals, and there are too few in-situ sensors. I am missing a discussion of related papers that discuss bigger inland regions of similar hydrogeophysics but better monitoring network with a similar approach. If I am right about the authors' intention, I am missing a much more extended discussion of how a monitoring network could look like, how many piezometers or observation wells would be needed, how could they be distributed to connect to the GRACE data. Without this I feel the paper misses a bit its mark.*

We thank the reviewer for the thoughtful and constructive review. We agree that the study area (Lower Kutai Basin, LKB) lies below the spatial resolution of GRACE and that limited piezometric coverage constrains robust quantification of groundwater storage dynamics. Indeed, our aim is to evaluate the applicability and limits of GRACE in small, coastal, and inadequately monitored regions. Demonstrating this limitation, though expected, is an important result in itself, given the need to assess and monitoring groundwater storage underlying Indonesia's new capital, Nusantara, in the LKB.

We have added a discussion of the Bengal Basin, which shares a similar coastal deltaic setting with the LKB but benefits from much denser monitoring networks (lines 479-481):

*“In the Bengal Basin (~138,000 km<sup>2</sup>), which shares a similar coastal deltaic setting as the LKB,  $\Delta$ GWS estimates derived from a dense network of monitoring wells exhibit a strong correlation with GRACE-based  $\Delta$ GWS (Shamsudduha et al., 2012). In other regions however, GRACE-based  $\Delta$ GWS align less well with observed values.”*

We have also expanded our discussion of what a future monitoring network in the LKB could look like. Specifically, we suggest the number of wells (~70) and their spatial density (~1 per 50 km<sup>2</sup> in urban areas and ~1 per 500 km<sup>2</sup> in rural or less populated areas) (lines 682-686):

*“For the study area, we suggest ~70 monitoring wells, one well per ~50 km<sup>2</sup> in urban areas such as Balikpapan and Samarinda and one per ~500 km<sup>2</sup> in rural or less populated regions. The final network will also need to consider proximity to major groundwater withdrawals and discharge zones, representation of key hydrostratigraphic units, and water-quality risk areas; such a network could support validation of GRACE-derived  $\Delta$ GWS estimates and inform groundwater management in Nusantara.”*

Responses to specific points are addressed below:

1. Title: I don't think the authors really succeed in „reconciling GRACE to piezometry“. This should be reflected in the title.

R1: We thank the reviewer for this helpful suggestion. We agree that our study highlights limitations, rather than successful reconciliation of GRACE-derived

groundwater storage changes with sparse piezometric observations. Accordingly, we have revised the title to better reflect the scope and findings of the study: ***“Groundwater storage dynamics and climate variability in the Lower Kutai Basin of Indonesia: challenges to the reconciliation of GRACE  $\Delta$ GWS and piezometry”***

2. The authors discuss the challenges of the GRACE residual approach, e.g. we need to know the soil moisture contribution. But we also need to know the contribution by surface water storage variability, water levels in wetlands and rivers, lakes and artificial reservoirs. The authors are aware of this. In my understanding, wetlands cover a significant share of land in Indonesia including the LKB. We need a quantitative discussion of the error that could be introduced here. WaterGAP may not be very good at this – WaterGAP does not simulate level changes in reservoirs, for example. And I suggest that the authors look into ways of quantifying this contribution, e.g. from remote sensing and/or radar altimetry. Similar for hydrology, in my understanding in Indonesia peatlands are abundant and peatland hydrology may not be well represented in GLDAS or WaterGAP. What is the anticipated error? Or isn't this the case in the LKB?

**R2:** We thank the reviewer for highlighting these important points. We agree that contributions from rivers, wetlands, lakes, and reservoirs introduce significant uncertainty into GRACE residual groundwater storage ( $\Delta$ GWS) estimates. To address this, we have substantially revised discussion of surface water storage changes ( $\Delta$ SWS) on lines 163-166, 330-345, and 609-616.

**Lines 163-166 (Data – 2.3 GLDAS and WGHM data):**

***“In addition, we employ the global lakes bathymetry (GLOBathy) dataset from Khazaei et al. (2022) and global surface water extent data from Pekel et al. (2016) to estimate lake water storage changes ( $\Delta$ LS) in the study area. Schwatke et al. (2015) provide global river water level data from satellite altimetry yet only one station is available in the LKB with limited temporal coverage.”***

**Lines 330-345 (Results – 3.2 Simulated water storage components from GLDAS and WGHM):**

***“ $\Delta$ SWS was derived from WGHM and Noah LSM, ranging between -1 to 3.7 cm for Noah and -5.3 to 5.5 cm for WGHM. The broader range in WGHM reflects stronger variability in simulated surface water processes. Using bathymetry data from 15 lakes in GLOBathy dataset (Khazaei et al., 2022), representing the major surface water bodies in the study area (Fig. S15) together with surface water extent changes from Pekel et al.***

(2016), we estimated lake storage changes ( $\Delta LS$ ).  $\Delta LS$  values are generally smaller than  $\Delta SWS$  from both Noah and WGHM, ranging from -1.6 to 0.8 cm (Fig. S16).  $\Delta LS$  from GLOBathy shows moderate agreement with WGHM-estimated  $\Delta LS$  ( $r = 0.52$ ;  $RMSE = 0.1$  cm) and  $\Delta SWS$  from Noah ( $r = 0.53$ ;  $RMSE = 0.1$  cm) but a weaker agreement with  $\Delta SWS$  from WGHM ( $r = 0.12$ ;  $RMSE = 0.4$  cm).

River storage changes could not be quantified because of the sparse river monitoring network (Schwatke et al., 2015). The global surface water dataset (Pekel et al., 2016) indicates that river areas in the LKB varied between 30 and 125 km<sup>2</sup> (mean ~110 km<sup>2</sup>) between 2003 and 2021 (Fig. S16), whereas lake areas varied between 10 and 370 km<sup>2</sup> (mean ~260 km<sup>2</sup>). These differences suggest that river storage changes were likely smaller than  $\Delta LS$ , though this remains unverified due to lack of volume estimates. In addition, wetlands and peatlands surrounding the lakes in the northwest of the study area (Patria et al., 2025) may contribute to underestimation of  $\Delta SWS$ . On average, lakes and rivers account for ~77% of the maximum surface water extent (Fig. S16), with wetlands and peatlands comprising the remaining ~23%. WGHM simulates negligible wetland storage variability (on the order of 10<sup>-2</sup> cm), indicating that current models may not adequately capture wetland and peatland dynamics.”

Lines 609-616 (Discussion – 4.3 Uncertainty in GRACE-based  $\Delta TWS$  and  $\Delta GWS$  estimates):

“In contrast,  $\Delta SWS$  from WGHM and Noah LSM appear more representative and are further supported by lake storage changes ( $\Delta LS$ ) derived from bathymetry of 15 lakes in the GLOBathy dataset (Khazaei et al., 2022) and surface water extent changes from Pekel et al. (2016).  $\Delta LS$  values show relatively good agreement with  $\Delta SWS$  from Noah LSM ( $RMSE = 0.1$  cm) and WGHM ( $RMSE = 0.4$  cm). Although river storage changes cannot be quantified directly due to sparse monitoring (Schwatke et al., 2015), the global surface water dataset (Pekel et al., 2016) suggests that river storage changes may be smaller than  $\Delta LS$  and thus contribute less to  $\Delta SWS$  than lakes. In addition, the lack of robust estimates for changes in wetlands and peatlands storage may lead to an underestimation of  $\Delta SWS$  as these systems account for ~23% of surface water extent changes.”

3. Similar, the Makassar and Sulawesi Straits are part of an ocean region that experiences above-average variability and sea level rise. Ocean signals are reduced in the standard GRACE data products but we know that the MPI reference ocean model which is forced by the atmosphere only does not capture all mass signals, and in coastal areas this may introduce a significant error irrespectively what mascon products were used. Put in simple words, the

*GRACE data may include real ocean mass change at least on the seasonal timescale here that could be misinterpreted as a groundwater signal. This is an error source that is not relevant for the average hydrological inland basin, but for Indonesia it may be very well. I'm missing a quantitative discussion here.*

**R3: We thank the reviewer for raising this critical comment. We agree that in the Indonesian maritime setting, particularly along the Makassar and Sulawesi Straits, strong ocean mass variability could introduce a distinct source of error into GRACE land grids. Standard GRACE products (mascons and spherical harmonics) attempt to reduce ocean leakage using ocean models, however, leakage may still persist. We have expanded our discussion of potential ocean leakage in lines 300-310:**

***“We further assessed leakage by pairing each Borneo land grid with the nearest ocean grid and computing correlations before and after detrending and deseasonalizing using STL (Fig. S12). Residual land-ocean correlations remain non-negligible and they differ by product. Within 100-150 km of the coast, CSR shows the highest median residual correlation (0.68;  $r^2 = 0.46$ ), whereas JPL (0.22;  $r^2 = 0.05$ ) and GSFC (0.17;  $r^2 = 0.03$ ) are much weaker. GFZ (0.43;  $r^2 = 0.18$ ) and COST-G (0.36;  $r^2 = 0.13$ ) fall in between. Inland (150-250 km), CSR weakens (0.42;  $r^2 = 0.17$ ), whereas GFZ (0.47;  $r^2 = 0.22$ ) and COST-G (0.42;  $r^2 = 0.17$ ) retain relatively moderate correlations that may reflect leakage and filtering artifacts. These results demonstrate that leakage effects are strongly product dependent, with CSR most affected near the coast and spherical harmonic products retaining inland correlations. These correlations represent, however, only an upper boundary since shared land-ocean variance may also reflect co-varying climate signals and ocean loading due to the non-unique nature of mass inversion (Heki and Jin, 2023; Ndehedehe and Ferreira, 2020; Chen et al., 2022; Chao, 2005). Identifying the relative contributions of different sources requires independent constraints from numerical modeling or alternative observational methods (Chen et al., 2022).”***

*4. The authors should also try to estimate the error in the piezometric analysis introduced by not knowing the local yield factor. They could take a range of possible yield factors from the hydrogeophysics maps or from publications and do a best/worst-case assessment.*

**R4: We agree that uncertainty in storage coefficients introduces substantial error into the conversion of groundwater level anomalies ( $\Delta\text{GWL}$ ) to storage changes ( $\Delta\text{GWS}$ ). In the revision, we have expanded our analysis to consider the implications of employing a range of storage coefficients (lines 492-502):**

***“In the study area, groundwater abstraction is concentrated within ~20 km of coast, particularly south of Balikpapan City (Fig. S23). We compared ensemble mean plausible GRACE-derived  $\Delta GWS$  with groundwater level changes ( $\Delta GWL$ ) as the storage coefficient ( $S$  or  $S_y$ ) is not well constrained. Lithological logs reveal heterogeneous interbedded sand and clay units (Fig. S24; Arifin et al. (2024)). Piezometer depths range from 21 to 135 m; shallow screens up to ~40 m may represent unconfined aquifers, whereas deeper screens may tap confined aquifers. In similar deltaic settings such as the Mekong and Indo-Gangetic deltas, storage coefficients mostly vary from ~0.08 to 0.25 (mean ~0.15) for unconfined aquifers and from  $\sim 10^{-5}$  to  $8 \times 10^{-4}$  (mean  $\sim 5 \times 10^{-4}$ ) for confined aquifers (BGS and DPHE, 2001; Bonsor et al., 2017; Van et al., 2023; Pechstein et al., 2018). This uncertainty translates into a range of possible  $\Delta GWS$  values (Fig. 8). On average, confined aquifers yield ~0.5 mm of storage loss per metre of decline ( $S = 5 \times 10^{-4}$ ), whereas unconfined aquifers yield ~15 cm ( $S_y = 0.15$ ). Although correlations are unaffected by this uncertainty, the amplitude of GRACE-derived  $\Delta GWS$  remains highly uncertain without reliable storage coefficients.”***

*5. The comparison of the GRACE product error with three mascon solutions appears not very robust. I would very much recommend that the authors consider at least one product based on spherical harmonics. It is an unproven claim that mascon solutions are better or more suitable to coastal regions. They are easy to apply but this is not the same as being more appropriate or having less errors.*

**R5: We appreciate this comment and agree that our evaluation should not be limited to mascon products nor suggest that mascons are inherently “better” for coastal regions. In the revision, we have incorporated two spherical harmonic (SH) solutions, GFZ and COST-G.**

*6. I’m missing a map of the aquifer systems in the LKB, in particular are these aquifers extending under the sea? The dashed line in Fig. 1 suggests this. Would coastal groundwater withdrawal then cause storage changes in the marine part of the aquifer? Would that be expected to become visible in GRACE as well? Isn’t this suppressed by the mascon approach? These are just ideas, I am not an expert in this regions. Again, most GRACE groundwater studies need not worry about this, but the region here is particularly challenging.*

**R6: A short description has been provided in lines 115-118; a hydrogeological map and cross-section in Figs. S2-S3 (Supplementary) illustrate aquifer distributions in the LKB and their potential continuation offshore.**

Lines 115-118:

***“Arifin et al. (2024) provide surface geological and hydrogeological maps of the coastal LKB (Fig. S2). The regional hydrostratigraphy is primarily composed of Miocene to Quaternary deltaic deposits which are extensively distributed across the coastal LKB (KESDM, 2022; Moss and Chambers, 1999). These deposits mainly consist of interbedded sand and clay layers, forming a complex aquifer system that may extend offshore (Fig. S3) toward the Makassar Strait (Arifin et al., 2025).”***

7. There are GRACE-assimilating hydrology model runs from NASA/Goddard and from the University of Bonn, Germany, and these provide the groundwater storage change at resolution between 30 and 50 km. Why don't the authors look into these data sets or add them to their ensembles?

**R7: We thank the reviewer for highlighting GRACE-assimilating models. In the revision, we have included  $\Delta$ GWS estimates from GLWS 2.0 assimilation product which integrates GRACE ITSG into WaterGAP, as well as the GLDAS-2.2 daily product which assimilates GRACE CSR into Catchment LSM.**

8. The authors mention several times that poor GRACE data or poor corrections in the residual approach lead to arithmetic problems. This is true, but an arithmetic problem is just a symptom that the data are poor. In other words, even if no arithmetic problem occurs this may be just by chance, and we should not trust the data. I think this needs to be made clear in a scientific paper.

**R8: We thank the reviewer for this important clarification. We agree that the occurrence of arithmetic problems may indicate poor or inconsistent data inputs, and the absence of such problems does not guarantee that the underlying GRACE or model-simulated components are reliable. We have made revisions in lines 617-622:**

***“Across the 54 realizations tested in this study, ~42% of GRACE-derived  $\Delta$ GWS estimates per realization are implausible, typically appearing as negative values during wet periods when all components are positive, or positive values during dry periods when all components are negative. Including implausible values reduces the correlation between  $\Delta$ GWS and  $\Delta$ TWS from 0.86 to 0.12 (Fig. 6a, b). The implausible values may not be merely computational anomalies but rather symptoms of poor or inconsistent input data, particularly where modeled  $\Delta$ SMS and  $\Delta$ SWS diverge from GRACE-observed  $\Delta$ TWS (Scanlon et al., 2018).”***

9. *Potential instrumental problems of the piezometric sensors should be discussed. I liked the part on the correlation between these data and the rainfall data, as it tells about the sensitivity. But this instigates trust for the short timescales only. What about the seasonal and interannual timescales, are there biases to be expected?*

**R9: We agree that although short-term sensitivity of piezometers to rainfall inputs provides confidence in their functionality, instrumental problems may introduce biases on seasonal and interannual timescales. We have expanded our discussion of potential instrumental limitations in lines 699-702:**

***“However, reliability requires periodic manual validation of piezometric sensors, such as monthly checks during the first few months of deployment and semi-annual checks thereafter, in order to mitigate instrumental issues such as sensor drift and calibration errors that can bias long-term records at seasonal or interannual timescales.”***

10. *Overall, the error budgeting needs more detail and quantification. This is, as I said earlier, partly a consequence of the fact that the LKB region is a particularly challenging one for GRACE. That also means if the authors succeed to make their case, this could be a breakthrough in the application of GRACE data, so it is really worth to dig deeper. At the moment, results appear somewhat inconclusive and the message is not too clear. I suggest that the study logic – what is the underlying hypothesis, what exactly do we expect from GRACE at such small scales, why looking at the piezo-rainfall correlation, why looking at ENSO – is explained right at the start.*

**R10: We thank the reviewer for this constructive feedback. We agree that clearer framing of the study logic and more transparent error budgeting are essential. We have re-reviewed the prose of each section to more clearly articulate the merits of this study and its findings. In addition, we have rewritten the last paragraph of the introduction (lines 88-95) to provide clearer context for the study.**

**Lines 88-95:**

***“This study examines whether GRACE can provide physically meaningful signals of groundwater storage variability in the small, coastal, and data-scarce Lower Kutai Basin (LKB), recognizing that its spatial scale lies below GRACE’s effective resolution and is highly susceptible to ocean leakage. Specifically, we (1) compare  $\Delta TWS$  across multiple GRACE products, (2) evaluate the plausibility of GRACE-derived  $\Delta GWS$  against limited piezometric data, and (3) assess whether large-scale climate drivers,***



***particularly ENSO, are detectable. The aim is to evaluate the limits of GRACE in this challenging setting and to demonstrate that without a substantially expanded piezometric network, neither GRACE nor in situ observations alone can provide robust groundwater storage assessments to support the development of climate-resilient groundwater management strategies, particularly in rapidly urbanizing regions such as Nusantara where water security is a growing concern.”***

## References

- Arifin, Shamsudduha, M., Ramdhan, A. M., Reksalegora, S. W., and Taylor, R. G.: Characterizing deep groundwater using evidence from oil and gas exploration wells in the Lower Kutai Basin of Indonesia, *Hydrogeology Journal*, 32, 1125-1144, 10.1007/s10040-024-02776-0, 2024.
- Arifin, Taylor, R. G., Shamsudduha, M., Ramdhan, A. M., Iskandar, I., Setiawan, T., Iman, M. I., and Noor, R. A.: Hydrochemistry of a coastal sedimentary basin: evidence from the Lower Kutai Basin, Indonesia, *Applied Geochemistry*, 190, 106496, 10.1016/j.apgeochem.2025.106496, 2025.
- BGS and DPHE: Arsenic contamination of groundwater in Bangladesh, in: British Geological Survey Technical Report WC/00/19, edited by: Kinniburgh, D. G., and Smedley, P. L., British Geological Survey, Keyworth, 2001.
- Bonsor, H. C., MacDonald, A. M., Ahmed, K. M., Burgess, W. G., Basharat, M., Calow, R. C., Dixit, A., Foster, S. S. D., Gopal, K., Lapworth, D. J., Moench, M., Mukherjee, A., Rao, M. S., Shamsudduha, M., Smith, L., Taylor, R. G., Tucker, J., van Steenbergen, F., Yadav, S. K., and Zahid, A.: Hydrogeological typologies of the Indo-Gangetic basin alluvial aquifer, South Asia, *Hydrogeology Journal*, 25, 1377-1406, 10.1007/s10040-017-1550-z, 2017.
- Chao, B. F.: On inversion for mass distribution from global (time-variable) gravity field, *Journal of Geodynamics*, 39, 223-230, 10.1016/j.jog.2004.11.001, 2005.
- Chen, J., Cazenave, A., Dahle, C., Llovel, W., Panet, I., Pfeffer, J., and Moreira, L.: Applications and Challenges of GRACE and GRACE Follow-On Satellite Gravimetry, *Surveys in Geophysics*, 43, 305-345, 10.1007/s10712-021-09685-x, 2022.
- Heki, K. and Jin, S.: Geodetic study on earth surface loading with GNSS and GRACE, *Satellite Navigation*, 4, 24, 10.1186/s43020-023-00113-6, 2023.
- KESDM: National geologic map and aquifer productivity [dataset], 2022.
- Khazaei, B., Read, L. K., Casali, M., Sampson, K. M., and Yates, D. N.: GLOBathy, the global lakes bathymetry dataset, *Scientific Data*, 9, 36, 10.1038/s41597-022-01132-9, 2022.
- Moss, S. J. and Chambers, J. L. C.: Tertiary facies architecture in the Kutai Basin, Kalimantan, Indonesia, *Journal of Asian Earth Sciences*, 17, 157-181, 10.1016/S0743-9547(98)00035-X, 1999.
- Ndehedehe, C. E. and Ferreira, V. G.: Identifying the footprints of global climate modes in time-variable gravity hydrological signals, *Climatic Change*, 159, 481-502, 10.1007/s10584-019-02588-2, 2020.
- Patria, A. A., Obrochta, S. P., and Anggara, F.: Tracing highly oxidized events and its response to peat dynamic from the northwest Kapuas coastal wetlands, Indonesia, *International Journal of Coal Geology*, 303, 104751, 10.1016/j.coal.2025.104751, 2025.
- Pechstein, A., Hanh, H. T., Orilski, J., Nam, L. H., and Manh, L. V.: Detailed Investigations on the hydrogeological situation in Ca Mau Province, Mekong Delta, Vietnam, 2018.
- Pekel, J.-F., Cottam, A., Gorelick, N., and Belward, A. S.: High-resolution mapping of global surface water and its long-term changes, *Nature*, 540, 418-422, 10.1038/nature20584, 2016.

- Scanlon, B. R., Zhang, Z., Save, H., Sun, A. Y., Müller Schmied, H., van Beek, L. P. H., Wiese, D. N., Wada, Y., Long, D., Reedy, R. C., Longuevergne, L., Döll, P., and Bierkens, M. F. P.: Global models underestimate large decadal declining and rising water storage trends relative to GRACE satellite data, *Proceedings of the National Academy of Sciences*, 115, E1080-E1089, 10.1073/pnas.1704665115, 2018.
- Schwatke, C., Dettmering, D., Bosch, W., and Seitz, F.: DAHITI – an innovative approach for estimating water level time series over inland waters using multi-mission satellite altimetry, *Hydrol. Earth Syst. Sci.*, 19, 4345-4364, 10.5194/hess-19-4345-2015, 2015.
- Shamsudduha, M., Taylor, R. G., and Longuevergne, L.: Monitoring groundwater storage changes in the highly seasonal humid tropics: Validation of GRACE measurements in the Bengal Basin, *Water Resources Research*, 48, 10.1029/2011WR010993, 2012.
- Van, T. D., Zhou, Y., Stigter, T. Y., Van, T. P., Hong, H. D., Uyen, T. D., and Tran, V. B.: Sustainable groundwater development in the coastal Tra Vinh province in Vietnam under saltwater intrusion and climate change, *Hydrogeology Journal*, 31, 731-749, 10.1007/s10040-023-02607-8, 2023.
